# Supplementary material for: Source apportionment study on particulate air pollution in two high-altitude Bolivian cities: La Paz and El Alto
Source: Copernicus journal article supplement (doi:10.5194/acp-23-10325-2023), 2023-09-15
Supplement: Supplementary file 1 [file acp-23-10325-2023-supplement.pdf]

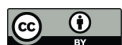

*Supplement of*

## **Source apportionment study on particulate air pollution in two high-altitude Bolivian cities: La Paz and El Alto**

**Valeria Mardoñ**

*Correspondence to:* Valeria Mardoñez ([valeria.mardonez@univ-grenoble-alpes.fr](mailto:valeria.mardonez@univ-grenoble-alpes.fr))

The copyright of individual parts of the supplement might differ from the article licence.

Table S1. Bolivian air quality guidelines<sup>1</sup>

| <i>Pollutant</i>                                      | <i>Concentration</i>   | <i>Period/ statistic characterization</i> |
|-------------------------------------------------------|------------------------|-------------------------------------------|
| <i>Carbon Monoxide (CO)</i>                           | 10 mg m <sup>-3</sup>  | 8h mean                                   |
|                                                       | 40 mg m <sup>-3</sup>  | 1h mean                                   |
| <i>Sulfur dioxide (SO<sub>2</sub>)</i>                | 80 µg m <sup>-3</sup>  | annual mean                               |
|                                                       | 365 µg m <sup>-3</sup> | 24h mean                                  |
| <i>Nitrogen dioxide (NO<sub>2</sub>)</i>              | 150 µg m <sup>-3</sup> | 24h mean                                  |
|                                                       | 400 µg m <sup>-3</sup> | 1h mean                                   |
| <i>Total suspended particles (TSP)</i>                | 260 µg m <sup>-3</sup> | 24h mean                                  |
|                                                       | 75 µg m <sup>-3</sup>  | annual mean                               |
| <i>Particles smaller than 10 µm (PM<sub>10</sub>)</i> | 150 µg m <sup>-3</sup> | 24h mean                                  |
|                                                       | 50 µg m <sup>-3</sup>  | annual mean                               |
| <i>Ozone (O<sub>3</sub>)</i>                          | 236 µg m <sup>-3</sup> | 1h mean                                   |
| <i>Lead (Pb)</i>                                      | 1.5 µg m <sup>-3</sup> | 3-month mean                              |

Figure S1. Photographs taken at the sampling sites (Left: El Alto sampling site; right: La Paz sampling site)

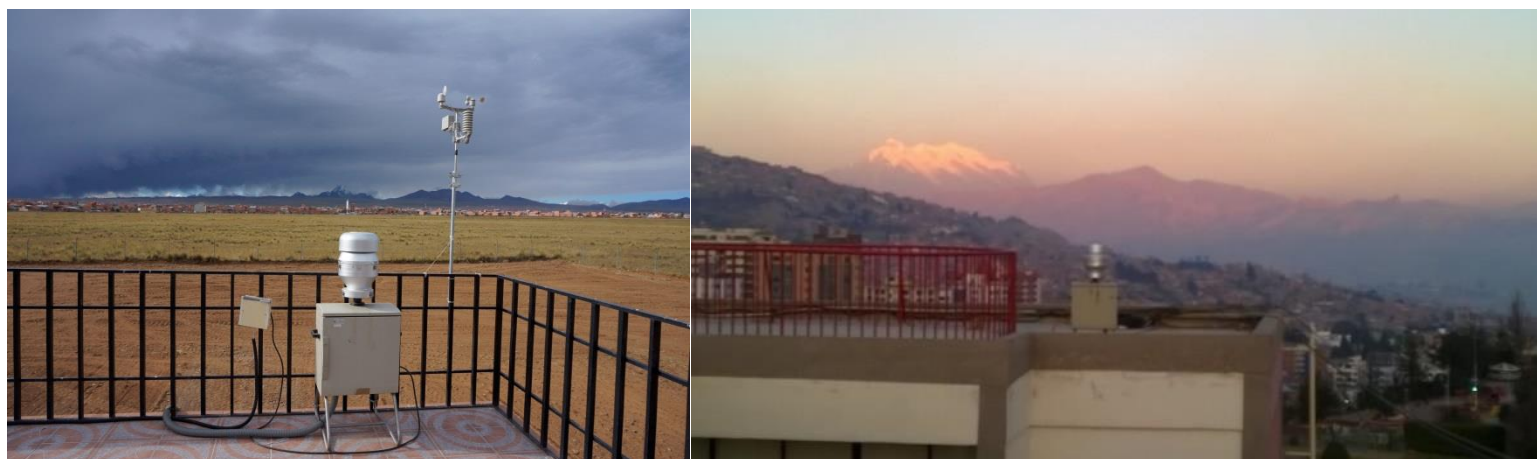

<sup>1</sup> The concentration values are referred to normal concentrations of pressure and temperature ( $\bar{T} = 298 K, \bar{P} = 1013.5 hPa$ )



Figure S2. Sampling sites. ©OpenStreetMap contributors 2020. Distributed under a Creative Commons BY-SA License

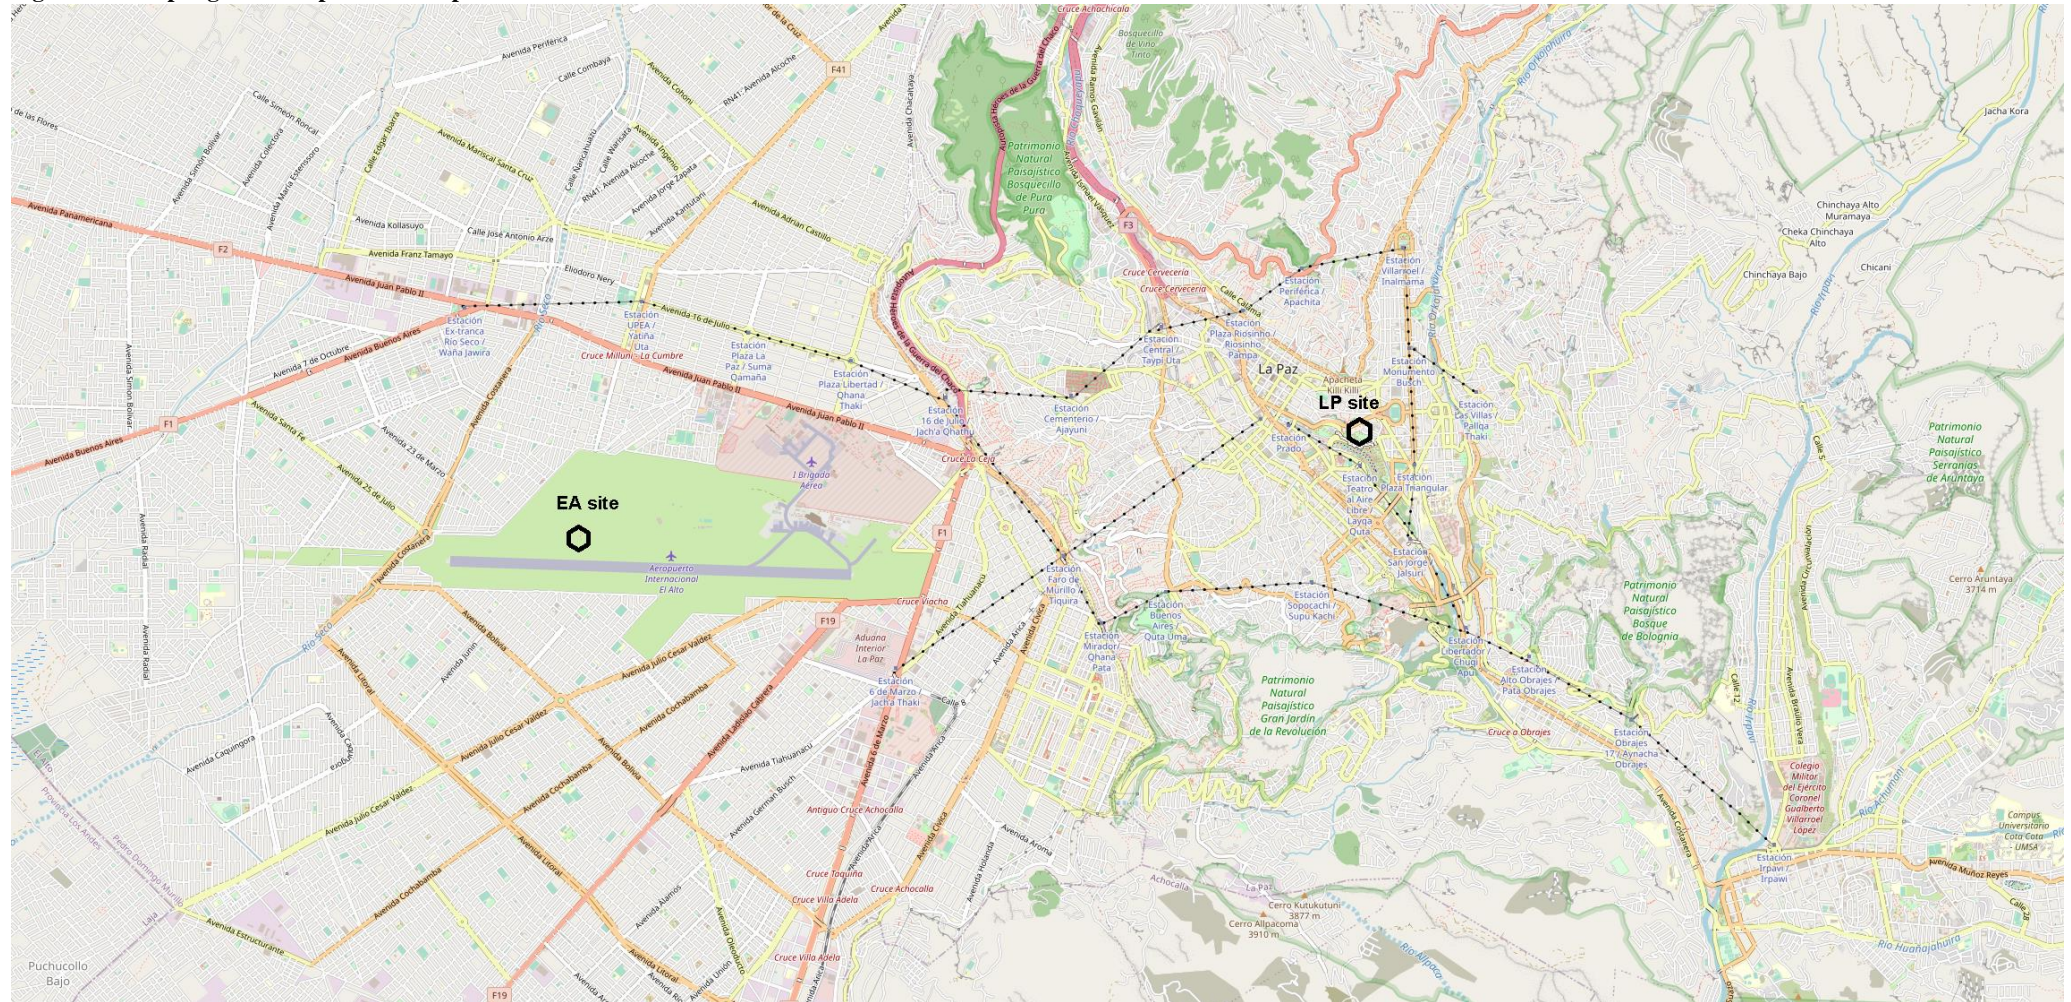



Table S2. Mean, median and standard deviation (sd) of the measured ambient concentrations (above the mean QL, after excluding outliers and samples collected during festivities or the day after, e.g. San Juan, Christmas and New Year). For STP concentrations, ambient concentrations in El Alto must be multiplied by a factor 1.52 and 1.46 for La Paz.

| Group                            | Specie                                        | Analysis                                                          | Units                    | mean<br>QL | El Alto (EA) |         |        |    | La Paz (LP) |         |        |     |
|----------------------------------|-----------------------------------------------|-------------------------------------------------------------------|--------------------------|------------|--------------|---------|--------|----|-------------|---------|--------|-----|
|                                  |                                               |                                                                   |                          |            | mean         | median  | sd     | n  | mean        | median  | sd     | n   |
|                                  | <b>particulate matter (PM)</b>                | gravimetry                                                        | [ $\mu\text{g m}^{-3}$ ] | ---        | 29.9         | 28.9    | 12.0   | 93 | 27.18       | 27.07   | 8.91   | 103 |
| <b>carbonaceous aerosols</b>     | <b>organic carbon (OC)</b>                    | thermal-optical analysis<br>(Cavalli et al., 2010)                | [ $\mu\text{g m}^{-3}$ ] | 0.21       | 3.51         | 3.48    | 1.57   | 93 | 3.85        | 3.68    | 1.78   | 103 |
|                                  | <b>elemental carbon (EC)</b>                  |                                                                   | [ $\mu\text{g m}^{-3}$ ] | 0.02       | 1.46         | 1.41    | 0.60   | 93 | 1.59        | 1.57    | 0.78   | 103 |
| <b>polyhydric alcohols</b>       | <b>arabitol</b>                               | high performance liquid chromatography (HPLC)                     | [ $\text{ng m}^{-3}$ ]   | 0.77       | 2.09         | 1.79    | 1.08   | 83 | 3.75        | 3.18    | 2.28   | 100 |
|                                  | <b>sorbitol</b>                               |                                                                   | [ $\text{ng m}^{-3}$ ]   | 0.79       | 9.13         | 5.34    | 10.77  | 75 | 13.88       | 7.75    | 17.38  | 87  |
|                                  | <b>mannitol</b>                               |                                                                   | [ $\text{ng m}^{-3}$ ]   | 0.77       | 3.82         | 3.37    | 2.67   | 88 | 6.73        | 5.30    | 4.53   | 97  |
| <b>monosaccharide anhydrides</b> | <b>levoglucosan</b>                           | (Piot et al., 2012)                                               | [ $\text{ng m}^{-3}$ ]   | 0.62       | 87.73        | 66.47   | 76.80  | 93 | 79.00       | 46.26   | 83.15  | 101 |
|                                  | <b>mannosan</b>                               |                                                                   | [ $\text{ng m}^{-3}$ ]   | 0.77       | 7.52         | 4.32    | 9.02   | 89 | 7.46        | 3.33    | 10.08  | 98  |
|                                  | <b>galactosan</b>                             |                                                                   | [ $\text{ng m}^{-3}$ ]   | 0.31       | 3.91         | 1.65    | 5.74   | 91 | 4.31        | 1.86    | 6.09   | 95  |
| <b>saccharides</b>               | <b>glucose</b>                                |                                                                   | [ $\text{ng m}^{-3}$ ]   | 0.77       | 14.35        | 13.81   | 5.84   | 93 | 22.07       | 22.33   | 8.81   | 102 |
| <b>ions</b>                      | <b>methanesulfonic acid (MSA<sup>-</sup>)</b> | ionic chromatography (IC)<br><br>(Jaffrezo et al., 2005)          | [ $\text{ng m}^{-3}$ ]   | 0.06       | 3.93         | 3.57    | 1.87   | 93 | 4.38        | 4.05    | 2.48   | 88  |
|                                  | <b>chloride (Cl<sup>-</sup>)</b>              |                                                                   | [ $\text{ng m}^{-3}$ ]   | 5.56       | 217.51       | 152.27  | 235.80 | 93 | 65.24       | 52.56   | 52.79  | 102 |
|                                  | <b>nitrate (NO<sub>3</sub><sup>-</sup>)</b>   |                                                                   | [ $\text{ng m}^{-3}$ ]   | 11.02      | 609.72       | 551.21  | 359.84 | 92 | 555.16      | 482.23  | 321.65 | 102 |
|                                  | <b>sulfate (SO<sub>4</sub><sup>2-</sup>)</b>  |                                                                   | [ $\text{ng m}^{-3}$ ]   | 5.29       | 1247.06      | 1068.66 | 723.87 | 93 | 1252.77     | 1098.03 | 769.54 | 102 |
|                                  | <b>oxalate (Ox<sup>-</sup>)</b>               |                                                                   | [ $\text{ng m}^{-3}$ ]   | 1.64       | 50.07        | 45.75   | 43.71  | 73 | 44.95       | 24.11   | 58.18  | 91  |
|                                  | <b>sodium (Na<sup>+</sup>)</b>                |                                                                   | [ $\text{ng m}^{-3}$ ]   | 10.47      | 52.05        | 46.35   | 32.64  | 86 | 40.94       | 39.59   | 21.10  | 95  |
|                                  | <b>ammonium (NH<sub>4</sub><sup>+</sup>)</b>  |                                                                   | [ $\text{ng m}^{-3}$ ]   | 8.74       | 511.29       | 451.65  | 399.06 | 93 | 403.81      | 333.12  | 308.04 | 102 |
|                                  | <b>potassium (K<sup>+</sup>)</b>              |                                                                   | [ $\text{ng m}^{-3}$ ]   | 2.76       | 77.41        | 68.44   | 52.61  | 93 | 73.34       | 56.82   | 55.77  | 102 |
|                                  | <b>magnesium (Mg<sup>+</sup>)</b>             |                                                                   | [ $\text{ng m}^{-3}$ ]   | 0.62       | 25.14        | 22.72   | 12.72  | 93 | 24.33       | 22.45   | 12.77  | 102 |
|                                  | <b>calcium (Ca<sup>+</sup>)</b>               |                                                                   | [ $\text{ng m}^{-3}$ ]   | 3.53       | 362.51       | 312.20  | 201.63 | 93 | 256.30      | 222.58  | 136.51 | 102 |
| <b>metals</b>                    | <b>aluminum (Al)</b>                          | inductively coupled plasma atomic emission spectrometry (ICP-AES) | [ $\mu\text{g m}^{-3}$ ] | 0.003      | 1.681        | 1.582   | 0.928  | 93 | 1.133       | 1.035   | 0.563  | 101 |
|                                  | <b>calcium (Ca)</b>                           |                                                                   | [ $\mu\text{g m}^{-3}$ ] | 0.001      | 0.428        | 0.386   | 0.218  | 93 | 0.350       | 0.328   | 0.181  | 101 |
|                                  | <b>potassium (K)</b>                          |                                                                   | [ $\mu\text{g m}^{-3}$ ] | 0.001      | 0.529        | 0.527   | 0.287  | 93 | 0.394       | 0.361   | 0.196  | 101 |
|                                  | <b>sodium (Na)</b>                            |                                                                   | [ $\mu\text{g m}^{-3}$ ] | 0.001      | 0.137        | 0.135   | 0.078  | 93 | 0.110       | 0.106   | 0.060  | 101 |
|                                  | <b>magnesium (Mg)</b>                         |                                                                   | [ $\mu\text{g m}^{-3}$ ] | 0.001      | 0.160        | 0.156   | 0.083  | 93 | 0.125       | 0.125   | 0.059  | 101 |
|                                  | <b>iron (Fe)</b>                              |                                                                   | [ $\mu\text{g m}^{-3}$ ] | 0.001      | 0.932        | 0.900   | 0.501  | 93 | 0.669       | 0.590   | 0.357  | 101 |
|                                  | <b>lithium (Li)</b>                           | inductively coupled plasma mass                                   | [ $\text{ng m}^{-3}$ ]   | 0.05       | 1.60         | 1.42    | 0.96   | 93 | 1.04        | 0.92    | 0.57   | 101 |
|                                  | <b>beryllium (Be)</b>                         |                                                                   | [ $\text{ng m}^{-3}$ ]   | 0.05       | 0.10         | 0.10    | 0.02   | 49 | 0.08        | 0.08    | 0.02   | 27  |
|                                  | <b>phosphor (P)</b>                           |                                                                   | [ $\text{ng m}^{-3}$ ]   | 0.05       | 37.08        | 34.43   | 17.91  | 93 | 25.48       | 22.66   | 11.94  | 101 |

|                          |                                                    |                       |      |       |       |       |      |       |       |       |     |
|--------------------------|----------------------------------------------------|-----------------------|------|-------|-------|-------|------|-------|-------|-------|-----|
| <b>scandium (Sc)</b>     | spectrometry (ICP-MS)<br><br>(Querol et al., 2001) | [ng m <sup>-3</sup> ] | 0.05 | 0.24  | 0.21  | 0.13  | 35   | 0.20  | 0.20  | 0.09  | 25  |
| <b>titanium (Ti)</b>     |                                                    | [ng m <sup>-3</sup> ] | 0.05 | 80.15 | 74.41 | 44.71 | 93   | 55.83 | 50.55 | 27.76 | 101 |
| <b>vanadium (V)</b>      |                                                    | [ng m <sup>-3</sup> ] | 0.05 | 2.04  | 2.01  | 1.08  | 88   | 1.54  | 1.49  | 0.73  | 97  |
| <b>chromium (Cr)</b>     |                                                    | [ng m <sup>-3</sup> ] | 0.05 | 2.66  | 1.84  | 4.52  | 78   | 2.36  | 2.02  | 1.45  | 97  |
| <b>manganese (Mn)</b>    |                                                    | [ng m <sup>-3</sup> ] | 0.05 | 16.48 | 15.75 | 8.71  | 93   | 12.69 | 11.90 | 6.19  | 101 |
| <b>cobalt (Co)</b>       |                                                    | [ng m <sup>-3</sup> ] | 0.05 | 0.36  | 0.32  | 0.18  | 91   | 0.24  | 0.22  | 0.11  | 99  |
| <b>nickel (Ni)</b>       |                                                    | [ng m <sup>-3</sup> ] | 0.05 | 1.18  | 0.96  | 1.29  | 83   | 1.12  | 0.86  | 0.84  | 99  |
| <b>copper (Cu)</b>       |                                                    | [ng m <sup>-3</sup> ] | 0.05 | 2.89  | 2.51  | 1.89  | 90   | 4.25  | 3.91  | 2.52  | 101 |
| <b>zinc (Zn)</b>         |                                                    | [ng m <sup>-3</sup> ] | 0.05 | 12.72 | 12.63 | 5.51  | 93   | 11.68 | 11.24 | 5.47  | 100 |
| <b>gallium (Ga)</b>      |                                                    | [ng m <sup>-3</sup> ] | 0.05 | 0.40  | 0.39  | 0.23  | 90   | 0.29  | 0.26  | 0.15  | 101 |
| <b>germanium (Ge)</b>    |                                                    | [ng m <sup>-3</sup> ] | 0.05 | 0.11  | 0.11  | 0.04  | 21   | 0.13  | 0.11  | 0.07  | 8   |
| <b>arsenic (As)</b>      |                                                    | [ng m <sup>-3</sup> ] | 0.05 | 1.81  | 1.53  | 1.07  | 93   | 1.03  | 0.98  | 0.46  | 101 |
| <b>selenium (Se)</b>     |                                                    | [ng m <sup>-3</sup> ] | 0.05 | 0.09  | 0.10  | 0.02  | 16   | 0.10  | 0.09  | 0.03  | 17  |
| <b>rubidium (Rb)</b>     |                                                    | [ng m <sup>-3</sup> ] | 0.05 | 3.12  | 2.88  | 1.76  | 93   | 2.11  | 1.88  | 1.10  | 101 |
| <b>strontium (Sr)</b>    |                                                    | [ng m <sup>-3</sup> ] | 0.05 | 3.45  | 3.36  | 1.90  | 93   | 2.64  | 2.42  | 1.33  | 101 |
| <b>yttrium (Y)</b>       |                                                    | [ng m <sup>-3</sup> ] | 0.05 | 0.43  | 0.42  | 0.23  | 83   | 0.37  | 0.31  | 0.26  | 85  |
| <b>zirconium (Zr)</b>    |                                                    | [ng m <sup>-3</sup> ] | 0.40 | 7.49  | 7.63  | 1.88  | 93   | 6.25  | 5.99  | 1.86  | 100 |
| <b>niobium (Nb)</b>      |                                                    | [ng m <sup>-3</sup> ] | 0.05 | 0.30  | 0.29  | 0.13  | 93   | 0.23  | 0.23  | 0.09  | 101 |
| <b>molibdene (Mo)</b>    |                                                    | [ng m <sup>-3</sup> ] | 0.05 | 1.21  | 1.09  | 0.74  | 49   | 1.39  | 1.00  | 1.13  | 29  |
| <b>cadmium (Cd)</b>      |                                                    | [ng m <sup>-3</sup> ] | 0.05 | 0.14  | 0.13  | 0.06  | 90   | 0.09  | 0.08  | 0.02  | 57  |
| <b>tin (Sn)</b>          |                                                    | [ng m <sup>-3</sup> ] | 0.05 | 0.58  | 0.44  | 0.43  | 92   | 0.40  | 0.36  | 0.22  | 101 |
| <b>antimony (Sb)</b>     |                                                    | [ng m <sup>-3</sup> ] | 0.05 | 1.05  | 0.80  | 0.83  | 91   | 0.95  | 0.78  | 0.67  | 101 |
| <b>cesium (Cs)</b>       |                                                    | [ng m <sup>-3</sup> ] | 0.05 | 0.34  | 0.29  | 0.19  | 90   | 0.22  | 0.21  | 0.12  | 97  |
| <b>barium (Ba)</b>       |                                                    | [ng m <sup>-3</sup> ] | 0.05 | 14.60 | 14.48 | 7.24  | 90   | 15.64 | 15.58 | 7.46  | 101 |
| <b>lanthanum (La)</b>    |                                                    | [ng m <sup>-3</sup> ] | 0.05 | 0.82  | 0.81  | 0.42  | 92   | 0.58  | 0.54  | 0.27  | 101 |
| <b>cerium (Ce)</b>       |                                                    | [ng m <sup>-3</sup> ] | 0.05 | 1.65  | 1.62  | 0.90  | 93   | 1.22  | 1.16  | 0.67  | 101 |
| <b>praseodymium (Pr)</b> |                                                    | [ng m <sup>-3</sup> ] | 0.05 | 0.20  | 0.20  | 0.10  | 86   | 0.17  | 0.17  | 0.06  | 94  |
| <b>neodymium (Nd)</b>    |                                                    | [ng m <sup>-3</sup> ] | 0.05 | 0.75  | 0.73  | 0.41  | 92   | 0.52  | 0.49  | 0.25  | 101 |
| <b>samarium (Sm)</b>     |                                                    | [ng m <sup>-3</sup> ] | 0.05 | 0.15  | 0.15  | 0.07  | 79   | 0.11  | 0.12  | 0.04  | 73  |
| <b>europium (Eu)</b>     |                                                    | [ng m <sup>-3</sup> ] | 0.05 | 0.07  | 0.07  | 0.01  | 26   | 0.07  | 0.07  |       | 1   |
| <b>gadolinium (Gd)</b>   | [ng m <sup>-3</sup> ]                              | 0.05                  | 0.14 | 0.14  | 0.06  | 73    | 0.11 | 0.10  | 0.05  | 73    |     |
| <b>terbium (Tb)</b>      | [ng m <sup>-3</sup> ]                              | 0.05                  | 0.07 | 0.07  | 0.01  | 46    | 0.07 | 0.07  | 0.01  | 18    |     |
| <b>dysprosium (Dy)</b>   | [ng m <sup>-3</sup> ]                              | 0.05                  | 0.12 | 0.11  | 0.04  | 61    | 0.10 | 0.08  | 0.05  | 59    |     |
| <b>holmium (Ho)</b>      | [ng m <sup>-3</sup> ]                              | 0.05                  | 0.07 | 0.07  | 0.01  | 47    | 0.07 | 0.07  | 0.00  | 6     |     |

|                                        |                                       |                                                                                   |                       |       |       |       |       |       |       |       |       |     |
|----------------------------------------|---------------------------------------|-----------------------------------------------------------------------------------|-----------------------|-------|-------|-------|-------|-------|-------|-------|-------|-----|
|                                        | <b>erbium (Er)</b>                    |                                                                                   | [ng m <sup>-3</sup> ] | 0.05  | 0.07  | 0.07  | 0.01  | 35    | 0.07  | 0.07  | 0.01  | 34  |
|                                        | <b>thulium (Tm)</b>                   |                                                                                   | [ng m <sup>-3</sup> ] | 0.05  |       |       |       | 0     |       |       |       | 0   |
|                                        | <b>ytterbium (Yb)</b>                 |                                                                                   | [ng m <sup>-3</sup> ] | 0.05  | 0.07  | 0.07  | 0.01  | 34    | 0.07  | 0.07  | 0.02  | 57  |
|                                        | <b>lutetium (Lu)</b>                  |                                                                                   | [ng m <sup>-3</sup> ] | 0.05  |       |       |       | 0     |       |       |       | 0   |
|                                        | <b>hafnium (Hf)</b>                   |                                                                                   | [ng m <sup>-3</sup> ] | 0.40  | 0.40  | 0.40  |       | 1     | 0.42  | 0.41  | 0.01  | 9   |
|                                        | <b>tantalum (Ta)</b>                  |                                                                                   | [ng m <sup>-3</sup> ] | 0.05  |       |       |       | 0     |       |       |       | 0   |
|                                        | <b>tungsten (W)</b>                   |                                                                                   | [ng m <sup>-3</sup> ] | 0.05  | 0.24  | 0.16  | 0.23  | 84    | 0.20  | 0.13  | 0.15  | 81  |
|                                        | <b>thallium (Tl)</b>                  |                                                                                   | [ng m <sup>-3</sup> ] | 0.05  | 0.07  | 0.07  | 0.01  | 2     |       |       |       | 0   |
|                                        | <b>lead (Pb)</b>                      |                                                                                   | [ng m <sup>-3</sup> ] | 0.05  | 2.87  | 2.52  | 1.61  | 93    | 2.05  | 1.84  | 1.17  | 100 |
|                                        | <b>bismuth (Bi)</b>                   |                                                                                   | [ng m <sup>-3</sup> ] | 0.05  | 0.26  | 0.12  | 0.46  | 29    | 0.19  | 0.12  | 0.19  | 19  |
|                                        | <b>thorium (Th)</b>                   |                                                                                   | [ng m <sup>-3</sup> ] | 0.05  | 0.40  | 0.34  | 0.28  | 89    | 0.26  | 0.22  | 0.18  | 97  |
|                                        | <b>uranium (U)</b>                    |                                                                                   | [ng m <sup>-3</sup> ] | 0.05  | 0.09  | 0.09  | 0.03  | 48    | 0.10  | 0.08  | 0.06  | 36  |
| <b>polyaromatic hydrocarbons (PAH)</b> | <b>phenanthrene (Phe)</b>             | high performance liquid chromatography (HPLC-Fluo)<br><br>(Besombes et al., 2001) | [ng m <sup>-3</sup> ] | 0.008 | 0.036 | 0.032 | 0.021 | 88    | 0.045 | 0.040 | 0.025 | 100 |
|                                        | <b>anthracene (An)</b>                |                                                                                   | [ng m <sup>-3</sup> ] | 0.001 | 0.004 | 0.003 | 0.002 | 90    | 0.005 | 0.004 | 0.003 | 99  |
|                                        | <b>fluoranthene (Fla)</b>             |                                                                                   | [ng m <sup>-3</sup> ] | 0.002 | 0.102 | 0.069 | 0.097 | 90    | 0.083 | 0.052 | 0.086 | 102 |
|                                        | <b>pyrene (Pyr)</b>                   |                                                                                   | [ng m <sup>-3</sup> ] | 0.003 | 0.123 | 0.082 | 0.119 | 91    | 0.105 | 0.070 | 0.107 | 102 |
|                                        | <b>triphenylene (Tri)</b>             |                                                                                   | [ng m <sup>-3</sup> ] | 0.002 | 0.080 | 0.063 | 0.070 | 91    | 0.052 | 0.036 | 0.052 | 101 |
|                                        | <b>retene (Ret)</b>                   |                                                                                   | [ng m <sup>-3</sup> ] | 0.000 | 0.103 | 0.039 | 0.152 | 87    | 0.045 | 0.019 | 0.054 | 91  |
|                                        | <b>benzo(a)anthracene (BaA)</b>       |                                                                                   | [ng m <sup>-3</sup> ] | 0.008 | 0.196 | 0.132 | 0.171 | 90    | 0.147 | 0.092 | 0.152 | 97  |
|                                        | <b>chrysene (Chr)</b>                 |                                                                                   | [ng m <sup>-3</sup> ] | 0.004 | 0.235 | 0.200 | 0.182 | 91    | 0.165 | 0.115 | 0.165 | 102 |
|                                        | <b>benzo(e)pyrene (BeP)</b>           |                                                                                   | [ng m <sup>-3</sup> ] | 0.005 | 0.273 | 0.215 | 0.282 | 91    | 0.228 | 0.170 | 0.235 | 102 |
|                                        | <b>benzo(b)fluoranthene (BbF)</b>     |                                                                                   | [ng m <sup>-3</sup> ] | 0.005 | 0.250 | 0.221 | 0.164 | 90    | 0.202 | 0.165 | 0.162 | 102 |
|                                        | <b>benzo(k)fluoranthene (BkF)</b>     |                                                                                   | [ng m <sup>-3</sup> ] | 0.002 | 0.104 | 0.096 | 0.070 | 90    | 0.081 | 0.063 | 0.067 | 100 |
|                                        | <b>benzo(a)pyrene (BaP)</b>           |                                                                                   | [ng m <sup>-3</sup> ] | 0.002 | 0.122 | 0.094 | 0.108 | 90    | 0.124 | 0.085 | 0.116 | 101 |
|                                        | <b>benzo(g,h,i)perylene (BghiP)</b>   |                                                                                   | [ng m <sup>-3</sup> ] | 0.008 | 0.410 | 0.387 | 0.228 | 90    | 0.404 | 0.351 | 0.291 | 101 |
|                                        | <b>dibenzo(a,h)anthracene (DBahA)</b> |                                                                                   | [ng m <sup>-3</sup> ] | 0.000 | 0.010 | 0.006 | 0.010 | 88    | 0.008 | 0.005 | 0.009 | 101 |
| <b>indeno(1,2,3-cd)pyrene (IP)</b>     | [ng m <sup>-3</sup> ]                 | 0.005                                                                             | 0.218                 | 0.214 | 0.136 | 91    | 0.196 | 0.155 | 0.144 | 102   |       |     |
| <b>coronene (Cor)</b>                  | [ng m <sup>-3</sup> ]                 | 0.002                                                                             | 0.251                 | 0.237 | 0.143 | 91    | 0.268 | 0.216 | 0.190 | 100   |       |     |
| <b>alkanes</b>                         | <b>C11</b>                            | gas chromatography–mass spectrometry (GS-MS)                                      | [ng m <sup>-3</sup> ] | 0.070 | 0.698 | 0.712 | 0.358 | 16    | 0.559 | 0.455 | 0.431 | 20  |
|                                        | <b>C12</b>                            |                                                                                   | [ng m <sup>-3</sup> ] | 0.170 | 0.254 | 0.254 | 0.052 | 4     | 1.588 | 0.865 | 1.846 | 3   |
|                                        | <b>C13</b>                            |                                                                                   | [ng m <sup>-3</sup> ] | 0.115 | 0.217 | 0.184 | 0.095 | 19    | 0.284 | 0.231 | 0.244 | 14  |
|                                        | <b>C14</b>                            |                                                                                   | [ng m <sup>-3</sup> ] | 0.070 | 0.126 | 0.107 | 0.036 | 7     | 0.121 | 0.108 | 0.024 | 3   |
|                                        | <b>C15</b>                            |                                                                                   | [ng m <sup>-3</sup> ] | 0.070 | 0.381 | 0.103 | 0.686 | 6     | 0.253 | 0.124 | 0.385 | 12  |
|                                        | <b>C16</b>                            |                                                                                   | [ng m <sup>-3</sup> ] | 0.115 | 0.194 | 0.170 | 0.049 | 3     | 0.224 | 0.176 | 0.119 | 6   |

|                   |                                |               |                       |       |       |       |       |    |       |       |       |     |
|-------------------|--------------------------------|---------------|-----------------------|-------|-------|-------|-------|----|-------|-------|-------|-----|
|                   | <b>C17</b>                     | (Golly, 2014) | [ng m <sup>-3</sup> ] | 0.138 | 0.228 | 0.219 | 0.061 | 33 | 0.236 | 0.229 | 0.058 | 20  |
|                   | <b>C18</b>                     |               | [ng m <sup>-3</sup> ] | 0.128 | 0.279 | 0.273 | 0.117 | 47 | 0.292 | 0.273 | 0.198 | 39  |
|                   | <b>C19</b>                     |               | [ng m <sup>-3</sup> ] | 0.109 | 0.571 | 0.548 | 0.404 | 62 | 0.449 | 0.376 | 0.271 | 55  |
|                   | <b>C20</b>                     |               | [ng m <sup>-3</sup> ] | 0.110 | 1.302 | 1.093 | 1.106 | 71 | 0.908 | 0.718 | 0.783 | 74  |
|                   | <b>C21</b>                     |               | [ng m <sup>-3</sup> ] | 0.339 | 2.375 | 1.691 | 2.056 | 75 | 1.674 | 0.923 | 1.611 | 93  |
|                   | <b>C22</b>                     |               | [ng m <sup>-3</sup> ] | 0.186 | 3.118 | 2.595 | 2.762 | 87 | 2.060 | 1.128 | 2.139 | 101 |
|                   | <b>C23</b>                     |               | [ng m <sup>-3</sup> ] | 0.314 | 3.149 | 2.634 | 2.552 | 86 | 2.482 | 1.398 | 2.443 | 100 |
|                   | <b>C24</b>                     |               | [ng m <sup>-3</sup> ] | 0.231 | 2.760 | 2.240 | 2.157 | 89 | 2.278 | 1.414 | 2.168 | 100 |
|                   | <b>C25</b>                     |               | [ng m <sup>-3</sup> ] | 0.598 | 2.849 | 2.265 | 1.889 | 83 | 2.500 | 1.692 | 1.991 | 97  |
|                   | <b>C26</b>                     |               | [ng m <sup>-3</sup> ] | 0.175 | 2.229 | 1.917 | 1.394 | 90 | 2.091 | 1.479 | 1.627 | 101 |
|                   | <b>C27</b>                     |               | [ng m <sup>-3</sup> ] | 0.580 | 2.678 | 2.148 | 1.847 | 84 | 2.714 | 1.982 | 2.255 | 100 |
|                   | <b>C28</b>                     |               | [ng m <sup>-3</sup> ] | 0.292 | 1.719 | 1.555 | 1.049 | 88 | 1.725 | 1.251 | 1.320 | 100 |
|                   | <b>C29</b>                     |               | [ng m <sup>-3</sup> ] | 0.841 | 2.891 | 2.306 | 2.015 | 83 | 2.920 | 1.861 | 3.077 | 93  |
|                   | <b>C30</b>                     |               | [ng m <sup>-3</sup> ] | 0.288 | 1.254 | 1.048 | 0.810 | 86 | 1.205 | 0.846 | 0.967 | 95  |
|                   | <b>C31</b>                     |               | [ng m <sup>-3</sup> ] | 0.570 | 2.348 | 1.647 | 1.785 | 82 | 2.300 | 1.429 | 2.464 | 83  |
|                   | <b>C32</b>                     |               | [ng m <sup>-3</sup> ] | 0.070 | 0.807 | 0.652 | 0.584 | 84 | 0.747 | 0.540 | 0.669 | 97  |
|                   | <b>C33</b>                     |               | [ng m <sup>-3</sup> ] | 0.070 | 0.755 | 0.658 | 0.538 | 84 | 0.825 | 0.577 | 0.830 | 89  |
|                   | <b>C34</b>                     |               | [ng m <sup>-3</sup> ] | 0.070 | 0.564 | 0.429 | 0.423 | 73 | 0.480 | 0.359 | 0.392 | 82  |
|                   | <b>C35</b>                     |               | [ng m <sup>-3</sup> ] | 0.070 | 0.629 | 0.429 | 0.556 | 68 | 0.484 | 0.293 | 0.474 | 77  |
|                   | <b>C36</b>                     |               | [ng m <sup>-3</sup> ] | 0.070 | 0.381 | 0.249 | 0.358 | 53 | 0.357 | 0.271 | 0.321 | 52  |
|                   | <b>C37</b>                     |               | [ng m <sup>-3</sup> ] | 0.070 | 0.394 | 0.255 | 0.468 | 36 | 0.198 | 0.166 | 0.151 | 24  |
|                   | <b>C38</b>                     |               | [ng m <sup>-3</sup> ] | 0.070 | 0.281 | 0.187 | 0.258 | 15 | 0.175 | 0.128 | 0.126 | 18  |
|                   | <b>C39</b>                     |               | [ng m <sup>-3</sup> ] | 0.070 | 0.351 | 0.224 | 0.362 | 17 | 0.164 | 0.114 | 0.122 | 24  |
|                   | <b>C40</b>                     |               | [ng m <sup>-3</sup> ] | 0.070 | 0.319 | 0.259 | 0.231 | 12 | 0.106 | 0.100 | 0.025 | 9   |
|                   | <b>Pristane</b>                |               | [ng m <sup>-3</sup> ] | 0.070 | 0.189 | 0.147 | 0.164 | 25 | 0.258 | 0.163 | 0.204 | 24  |
|                   | <b>Phytane</b>                 |               | [ng m <sup>-3</sup> ] | 0.070 | 0.180 | 0.161 | 0.082 | 23 | 0.196 | 0.150 | 0.139 | 36  |
| <b>Methyl PAH</b> | <b>2-methyl-naphthalene</b>    |               | [ng m <sup>-3</sup> ] | 0.019 |       |       |       | 0  |       |       |       | 0   |
|                   | <b>1-methyl-fluorene</b>       |               | [ng m <sup>-3</sup> ] | 0.007 |       |       |       | 0  | 0.040 | 0.011 | 0.051 | 3   |
|                   | <b>3-methyl-phenanthrene</b>   |               | [ng m <sup>-3</sup> ] | 0.025 |       |       |       | 0  | 0.125 | 0.125 | 0.141 | 2   |
|                   | <b>2-methyl-phenanthrene</b>   |               | [ng m <sup>-3</sup> ] | 0.014 |       |       |       | 0  | 0.018 | 0.017 | 0.005 | 7   |
|                   | <b>2-methyl-anthracene</b>     |               | [ng m <sup>-3</sup> ] | 0.014 |       |       |       | 0  | 0.041 | 0.041 | 0.035 | 2   |
|                   | <b>4/9-methyl-phenanthrene</b> |               | [ng m <sup>-3</sup> ] | 0.014 |       |       |       | 0  | 0.040 | 0.040 |       | 1   |
|                   | <b>1-methyl-phenanthrene</b>   |               | [ng m <sup>-3</sup> ] | 0.007 | 0.010 | 0.010 |       | 1  | 0.022 | 0.013 | 0.029 | 9   |
|                   | <b>4-methyl-pyrene</b>         |               | [ng m <sup>-3</sup> ] | 0.007 | 0.019 | 0.015 | 0.012 | 25 | 0.022 | 0.015 | 0.015 | 32  |

|                       |                                                  |                       |       |       |       |       |    |       |       |       |     |
|-----------------------|--------------------------------------------------|-----------------------|-------|-------|-------|-------|----|-------|-------|-------|-----|
|                       | <b>1-methyl-pyrene</b>                           | [ng m <sup>-3</sup> ] | 0.007 | 0.024 | 0.017 | 0.016 | 27 | 0.025 | 0.017 | 0.018 | 37  |
|                       | <b>1+3-Methyl-fluorene</b>                       | [ng m <sup>-3</sup> ] | 0.007 | 0.016 | 0.015 | 0.005 | 13 | 0.017 | 0.014 | 0.006 | 14  |
|                       | <b>Methyl-fluorene/pyrene</b>                    | [ng m <sup>-3</sup> ] | 0.007 | 0.015 | 0.011 | 0.008 | 20 | 0.016 | 0.016 | 0.007 | 21  |
|                       | <b>1-methylfluoranthene</b>                      | [ng m <sup>-3</sup> ] | 0.007 | 0.017 | 0.015 | 0.009 | 21 | 0.020 | 0.014 | 0.013 | 26  |
|                       | <b>3-methyl-chrysene</b>                         | [ng m <sup>-3</sup> ] | 0.008 | 0.034 | 0.031 | 0.022 | 32 | 0.039 | 0.026 | 0.037 | 54  |
|                       | <b>Methyl-chrysene/BenzoAnthracene</b>           | [ng m <sup>-3</sup> ] | 0.007 | 0.016 | 0.014 | 0.008 | 28 | 0.022 | 0.016 | 0.016 | 39  |
| <b>thiophens</b>      | <b>DBT (DiBenzoThiophen)</b>                     | [ng m <sup>-3</sup> ] | 0.007 | 0.011 | 0.011 | 0.003 | 4  | 0.024 | 0.013 | 0.022 | 7   |
|                       | <b>PheT(4,5) (Phenanthro(4,5 bcd)Thiophen)</b>   | [ng m <sup>-3</sup> ] | 0.007 | 0.012 | 0.011 | 0.004 | 4  | 0.016 | 0.011 | 0.016 | 16  |
|                       | <b>BNT(2,1) (Benzo(b)Naphto(2,1 d)Thiophen)</b>  | [ng m <sup>-3</sup> ] | 0.027 | 0.027 | 0.027 | 0.006 | 7  | 0.040 | 0.039 | 0.020 | 14  |
|                       | <b>BNT(1,2) (Benzo(b)Naphto(1,2 d)Thiophen)</b>  | [ng m <sup>-3</sup> ] | 0.007 | 0.009 | 0.010 | 0.001 | 3  | 0.016 | 0.010 | 0.009 | 9   |
|                       | <b>BNT(2,3) (Benzo(b)Naphto(2,3 d)Thiophen)</b>  | [ng m <sup>-3</sup> ] | 0.007 | 0.010 | 0.010 | 0.002 | 12 | 0.017 | 0.015 | 0.009 | 12  |
|                       | <b>DNT(2,1) (Dinaphto (2,1) Thiophen)</b>        | [ng m <sup>-3</sup> ] | 0.007 | 0.014 | 0.011 | 0.008 | 3  | 0.014 | 0.012 | 0.006 | 3   |
|                       | <b>BPT(2,1) (Benzo(b)Phenanto(2,1d)thiophen)</b> | [ng m <sup>-3</sup> ] | 0.007 |       |       |       | 0  |       |       |       | 0   |
| <b>hopanes</b>        | <b>HP1 (Trisnorneohopane)</b>                    | [ng m <sup>-3</sup> ] | 0.012 | 0.060 | 0.041 | 0.048 | 46 | 0.074 | 0.049 | 0.065 | 64  |
|                       | <b>HP2 (17α(H)-Trisnorhopane)</b>                | [ng m <sup>-3</sup> ] | 0.013 | 0.047 | 0.038 | 0.031 | 54 | 0.056 | 0.039 | 0.044 | 94  |
|                       | <b>HP3 (17α(H)-21β(H)-Norhopane)</b>             | [ng m <sup>-3</sup> ] | 0.007 | 0.143 | 0.097 | 0.122 | 87 | 0.215 | 0.147 | 0.183 | 99  |
|                       | <b>HP4 (17α(H)-21β(H)-Hopane)</b>                | [ng m <sup>-3</sup> ] | 0.011 | 0.179 | 0.119 | 0.150 | 83 | 0.255 | 0.168 | 0.212 | 99  |
|                       | <b>HP5 (17α(H)-21β(H)-22S-Homohopane)</b>        | [ng m <sup>-3</sup> ] | 0.007 | 0.077 | 0.050 | 0.064 | 77 | 0.109 | 0.069 | 0.093 | 98  |
|                       | <b>HP6 (17α(H)-21β(H)-22R-Homohopane)</b>        | [ng m <sup>-3</sup> ] | 0.007 | 0.059 | 0.035 | 0.053 | 72 | 0.081 | 0.050 | 0.074 | 99  |
|                       | <b>HP7 (17α(H)-21β(H)-22S-Bishomohopane)</b>     | [ng m <sup>-3</sup> ] | 0.007 | 0.057 | 0.036 | 0.053 | 73 | 0.077 | 0.043 | 0.072 | 100 |
|                       | <b>HP8 (17α(H)-21β(H)-22R-Bishomohopane)</b>     | [ng m <sup>-3</sup> ] | 0.007 | 0.042 | 0.026 | 0.034 | 66 | 0.058 | 0.037 | 0.051 | 94  |
|                       | <b>HP9 (17α(H)-21β(H)-22S-Trishomohopane)</b>    | [ng m <sup>-3</sup> ] | 0.007 | 0.044 | 0.023 | 0.043 | 68 | 0.057 | 0.031 | 0.055 | 89  |
|                       | <b>HP10 (17α(H)-21β(H)-22R-Trishomohopane)</b>   | [ng m <sup>-3</sup> ] | 0.007 | 0.038 | 0.024 | 0.028 | 57 | 0.043 | 0.024 | 0.039 | 77  |
| <b>methoxyphenols</b> | <b>DMPT (6,10,14-trimethyl-2-pentadecanone)</b>  | [ng m <sup>-3</sup> ] | 0.055 | 0.749 | 0.524 | 0.637 | 89 | 0.984 | 0.631 | 1.345 | 102 |
|                       | <b>Vanillin</b>                                  | [ng m <sup>-3</sup> ] | 0.017 | 0.199 | 0.162 | 0.119 | 22 | 0.172 | 0.144 | 0.101 | 22  |
|                       | <b>Acetovanillone</b>                            | [ng m <sup>-3</sup> ] | 0.055 | 0.280 | 0.236 | 0.169 | 27 | 0.272 | 0.095 | 0.520 | 16  |
|                       | <b>Guaiacyl acetone</b>                          | [ng m <sup>-3</sup> ] | 0.057 | 0.239 | 0.226 | 0.117 | 15 | 0.161 | 0.143 | 0.086 | 14  |
|                       | <b>Coniferylaldehyde</b>                         | [ng m <sup>-3</sup> ] | 0.056 | 0.260 | 0.224 | 0.137 | 4  | 0.352 | 0.281 | 0.199 | 4   |



|                              |                                 |  |                       |       |       |       |       |    |       |       |       |    |
|------------------------------|---------------------------------|--|-----------------------|-------|-------|-------|-------|----|-------|-------|-------|----|
|                              | <b>Vanillic acid</b>            |  | [ng m <sup>-3</sup> ] | 0.018 | 0.577 | 0.423 | 0.449 | 46 | 0.713 | 0.533 | 0.723 | 40 |
|                              | <b>Homovanillic acid</b>        |  | [ng m <sup>-3</sup> ] | 0.014 | 0.218 | 0.175 | 0.079 | 3  | 0.087 | 0.087 | 0.034 | 2  |
|                              | <b>Syringol</b>                 |  | [ng m <sup>-3</sup> ] | 0.006 |       |       |       | 0  | 0.066 | 0.066 |       | 1  |
|                              | <b>4-methylsyringol</b>         |  | [ng m <sup>-3</sup> ] | 0.006 |       |       |       | 0  | 0.032 | 0.032 |       | 1  |
|                              | <b>4-propenylsyringol</b>       |  | [ng m <sup>-3</sup> ] | 0.028 |       |       |       | 0  | 0.093 | 0.093 |       | 1  |
|                              | <b>Acetosyringone</b>           |  | [ng m <sup>-3</sup> ] | 0.028 | 0.398 | 0.353 | 0.227 | 33 | 0.420 | 0.409 | 0.220 | 31 |
|                              | <b>Syringyl acetone</b>         |  | [ng m <sup>-3</sup> ] | 0.017 | 0.181 | 0.181 |       | 1  | 0.089 | 0.089 |       | 1  |
|                              | <b>Sinapyl aldehyde</b>         |  | [ng m <sup>-3</sup> ] | 0.056 | 0.160 | 0.160 |       | 1  | 0.348 | 0.348 | 0.204 | 2  |
|                              | <b>Syringic acid</b>            |  | [ng m <sup>-3</sup> ] | 0.018 | 0.322 | 0.283 | 0.182 | 34 | 0.442 | 0.331 | 0.328 | 33 |
| <b>sterols</b>               | <b>Cholesterol</b>              |  | [ng m <sup>-3</sup> ] | 0.056 | 2.300 | 1.926 | 1.412 | 11 | 1.534 | 1.413 | 0.858 | 22 |
| <b>methyl-nitrocatechols</b> | <b>3methylcatechol</b>          |  | [ng m <sup>-3</sup> ] | 0.070 |       |       |       | 0  | 0.133 | 0.133 |       | 1  |
|                              | <b>4-methylcatechol</b>         |  | [ng m <sup>-3</sup> ] | 0.084 |       |       |       | 0  |       |       |       | 0  |
|                              | <b>4nitroguaiacol</b>           |  | [ng m <sup>-3</sup> ] | 0.300 | 0.414 | 0.414 |       | 1  |       |       |       | 0  |
|                              | <b>4nitrocatechol</b>           |  | [ng m <sup>-3</sup> ] | 0.140 | 1.001 | 0.806 | 0.601 | 14 | 1.602 | 1.458 | 1.130 | 22 |
|                              | <b>3-methyl-6-nitrocatechol</b> |  | [ng m <sup>-3</sup> ] | 0.124 |       |       |       | 0  |       |       |       | 0  |
|                              | <b>4-methyl-5-nitrocatechol</b> |  | [ng m <sup>-3</sup> ] | 0.140 | 0.236 | 0.248 | 0.022 | 3  | 0.381 | 0.334 | 0.165 | 12 |
|                              | <b>3-methyl-5-nitrocatechol</b> |  | [ng m <sup>-3</sup> ] | 0.070 | 0.355 | 0.292 | 0.122 | 3  | 0.523 | 0.581 | 0.245 | 13 |
|                              | <b>3methyl4nitrocatechol</b>    |  | [ng m <sup>-3</sup> ] | 0.124 | 0.195 | 0.195 |       | 1  | 0.925 | 0.281 | 1.096 | 7  |

Table S3. Species analyzed from fuel samples collected at La Paz and El Alto

|                 | <b>Sample#</b> | <b>Al</b> | <b>Cr</b> | <b>Mn</b> | <b>Fe</b> | <b>Co</b> | <b>Ni</b> | <b>Cu</b> | <b>Zn</b> | <b>As</b> | <b>Ag</b> | <b>Cd</b> | <b>Pb</b> |
|-----------------|----------------|-----------|-----------|-----------|-----------|-----------|-----------|-----------|-----------|-----------|-----------|-----------|-----------|
|                 |                | mg/l      |
| <i>gasoline</i> | 1              | 13.7      | 3.96      | 63.0      | 2.81      | 0.05      | 0.23      | 0         | 0.85      | 4.00      | 0.12      | 0.002     | 0.10      |
| <i>gasoline</i> | 2              | 8.23      | 3.84      | 67.3      | 0.00      | 0.03      | 0.10      | 0         | 1.68      | 3.47      | 0.09      | 0.003     | 0.10      |
| <i>gasoline</i> | 3              | 8.54      | 3.51      | 61.7      | 0.00      | 0.03      | 0.07      | 0         | 1.71      | 3.07      | 0.01      | 0.004     | 0.10      |
| <i>diesel</i>   | 4              | 14.9      | 9.82      | 0.66      | 0.00      | 0.02      | 0.13      | 0         | 7.85      | 4.00      | 0.01      | 0.005     | 0.25      |
| <i>diesel</i>   | 5              | 15.8      | 8.81      | 0.41      | 0.00      | 0.02      | 0.13      | 0         | 6.55      | 3.74      | 0.00      | 0.007     | 0.27      |
| <i>diesel</i>   | 6              | 35.0      | 10.2      | 0.91      | 11.6      | 0.02      | 0.11      | 0         | 7.49      | 4.36      | 0.01      | 0.011     | 0.28      |

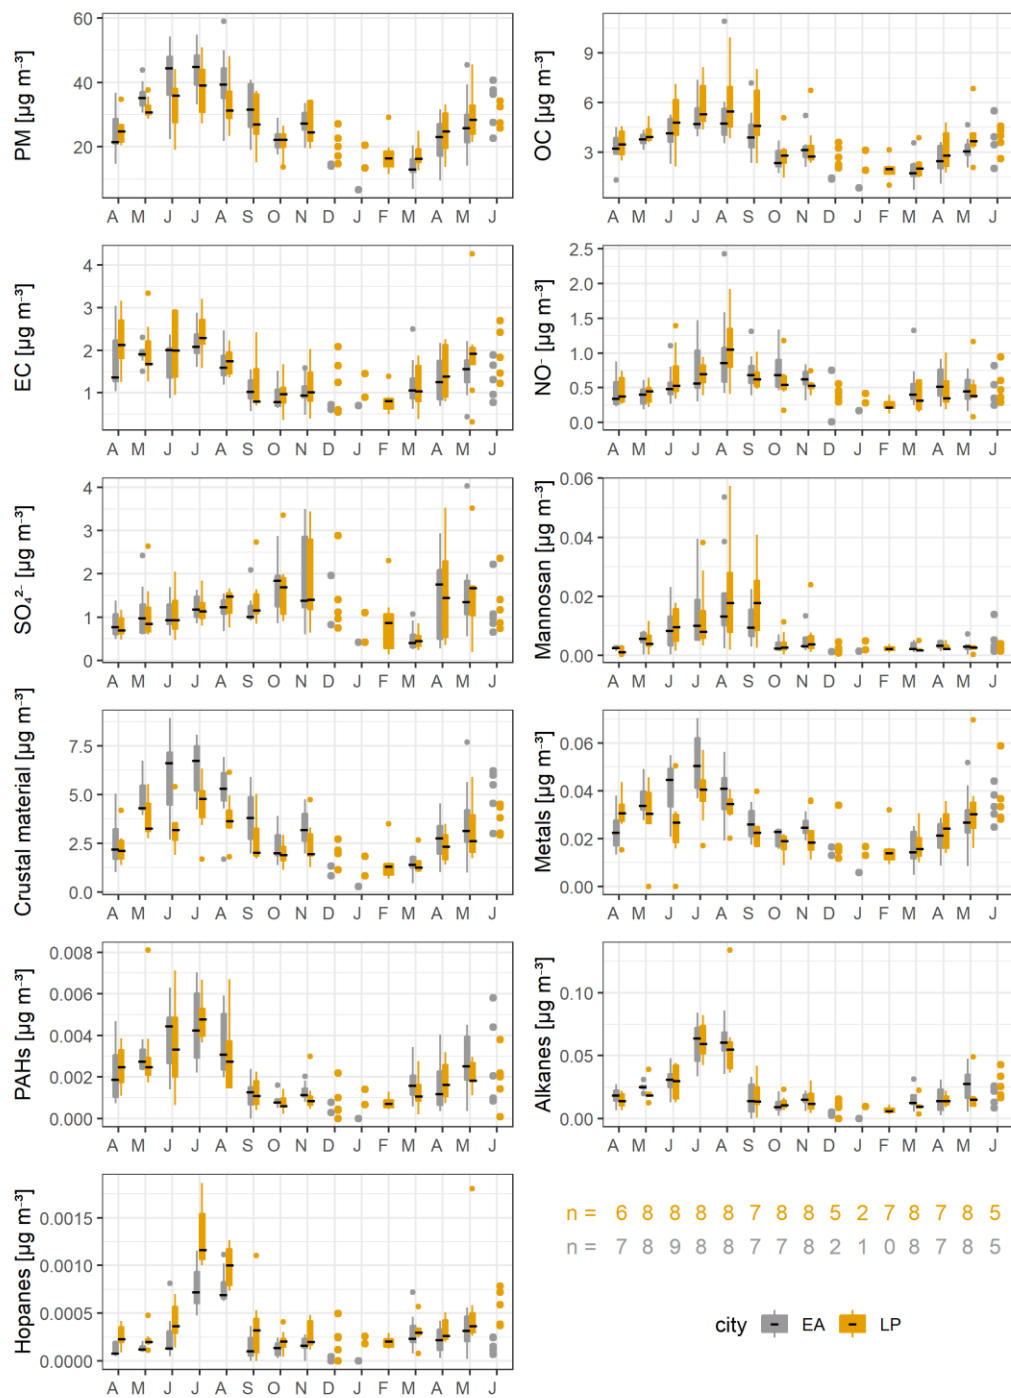

**Figure S3. Monthly variation of major contributor species to PM<sub>10</sub>, crustal material comprises: Al, Fe, Ti, Ca, Mg, K, Mn, P; metals comprises: Co, Ni, Cu, Zn, As, Rb, Sr, Cd, Sn, Sb, Pb; PAHs is the sum of: Phe, An, Fla, Pyr, Tri, Ret, BaA, Chr, BeP, BbF, BkF, BaP, BghiP, DBahA, IP, Cor; alkanes are the sum of C20-C31, hopanes the sum of HP3 and HP4; and n is the number of filters collected in the corresponding month at each site.**

Figure S4. Chemical profile of single-site sources of PM<sub>10</sub>

El Alto

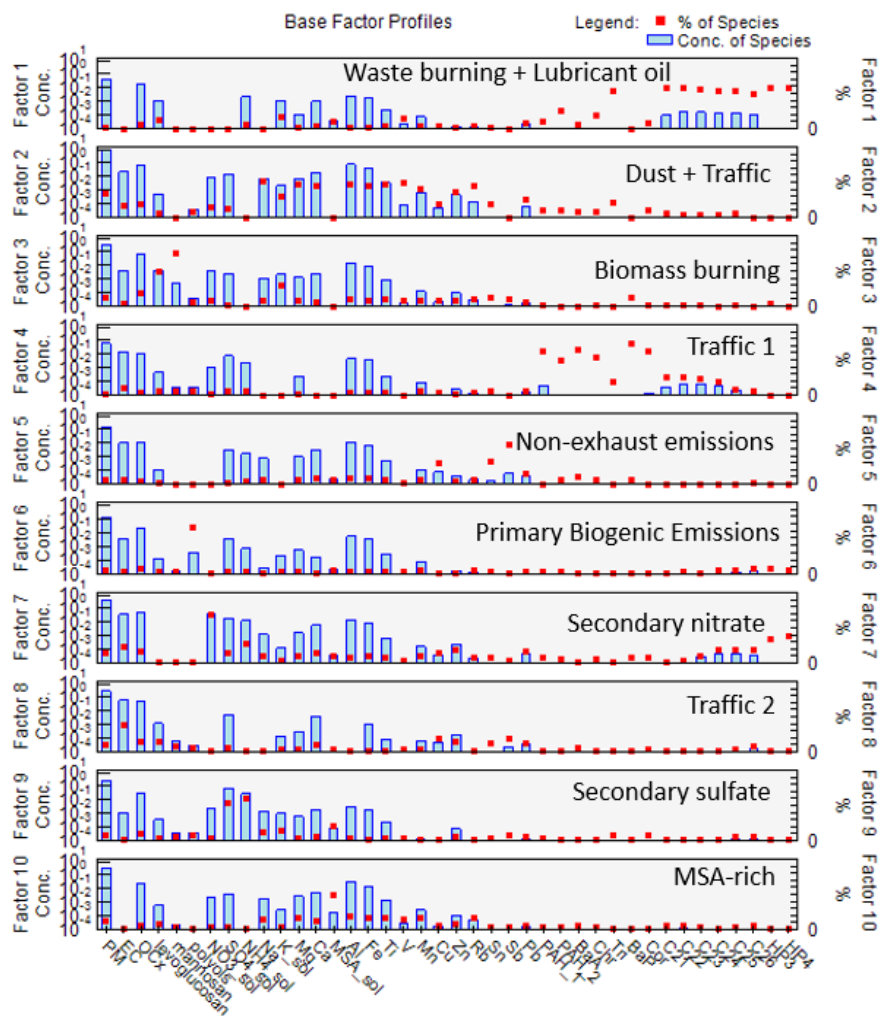

La Paz

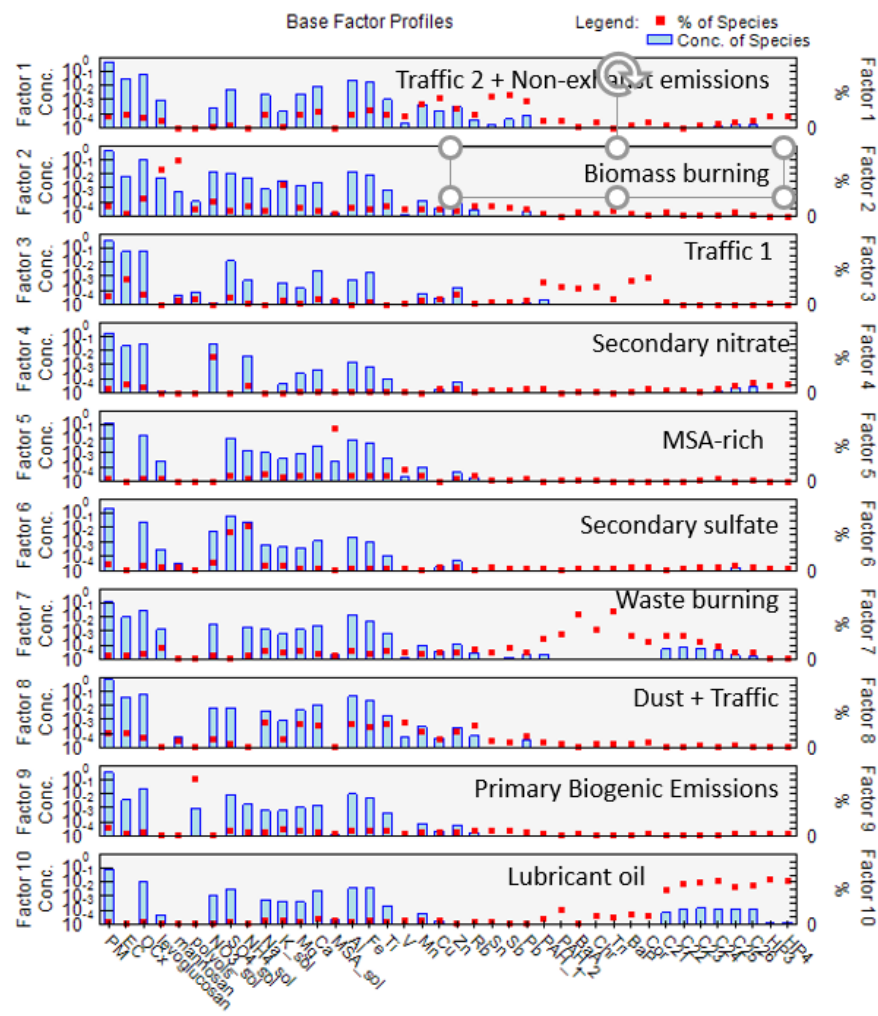



Table S5. Bootstrap mapping of single site solution La Paz

|                       | Traffic 2 +<br>Non-<br>exhaust | Biomass<br>Burning | Traffic 1 | Secondary<br>nitrate | MSA-rich | Secondary<br>sulfate | Waste<br>burning | Dust | Primary<br>Biogenic<br>Aerosols | Lubricant<br>oil | Unmapped |
|-----------------------|--------------------------------|--------------------|-----------|----------------------|----------|----------------------|------------------|------|---------------------------------|------------------|----------|
| <b>Boot Factor 1</b>  | 84                             | 1                  | 3         | 1                    | 1        | 0                    | 4                | 3    | 0                               | 3                | 0        |
| <b>Boot Factor 2</b>  | 0                              | 100                | 0         | 0                    | 0        | 0                    | 0                | 0    | 0                               | 0                | 0        |
| <b>Boot Factor 3</b>  | 11                             | 0                  | 80        | 0                    | 0        | 1                    | 5                | 1    | 0                               | 2                | 0        |
| <b>Boot Factor 4</b>  | 0                              | 0                  | 0         | 99                   | 0        | 0                    | 0                | 0    | 0                               | 1                | 0        |
| <b>Boot Factor 5</b>  | 0                              | 0                  | 0         | 0                    | 100      | 0                    | 0                | 0    | 0                               | 0                | 0        |
| <b>Boot Factor 6</b>  | 0                              | 0                  | 0         | 0                    | 0        | 100                  | 0                | 0    | 0                               | 0                | 0        |
| <b>Boot Factor 7</b>  | 2                              | 0                  | 2         | 0                    | 0        | 0                    | 94               | 1    | 0                               | 1                | 0        |
| <b>Boot Factor 8</b>  | 0                              | 0                  | 0         | 0                    | 0        | 0                    | 1                | 98   | 0                               | 1                | 0        |
| <b>Boot Factor 9</b>  | 0                              | 0                  | 0         | 0                    | 0        | 0                    | 0                | 0    | 100                             | 0                | 0        |
| <b>Boot Factor 10</b> | 3                              | 0                  | 1         | 0                    | 0        | 0                    | 3                | 1    | 0                               | 92               | 0        |

Table S6. Spearman correlations between chloride and each of the resolved sources of PM. Strongest correlations are found between Cl- and Waste burning, secondly with TR1 and Non-exhaust.

|          |        | Waste<br>burning | Sec.<br>sulfate | TR1  | MSA-<br>rich | Lubricant | BB   | Dust | Sec.<br>Nitrate | Non-<br>Exhaust | PBA   | TR2  |
|----------|--------|------------------|-----------------|------|--------------|-----------|------|------|-----------------|-----------------|-------|------|
| Spearman | Cl- EA | 0.75             | -0.22           | 0.57 | 0.34         | 0.28      | 0.47 | 0.59 | -0.24           | 0.67            | -0.19 | 0.25 |
|          | Cl- LP | 0.67             | 0.01            | 0.61 | 0.39         | 0.49      | 0.53 | 0.45 | 0.19            | 0.57            | -0.25 | 0.44 |

### Test of Similarity of Chemical Profiles

In source apportionment studies, factors are labeled according to their chemical profile and its similarity to what was previously reported in the literature. Although the source identification is based on the specific tracers of the different sources, the exact chemical profile of sources with the same name could vary from site to site. Thus, a metric to quantitatively evaluate the similarity between two factors was proposed by Belis et al. 2015 and Pernigotti & Belis, 2018. Two parameters are considered to establish given similarity: the Pearson distance (PD) and the similarity Identity distance (SID), defined as follows:

$$PD = 1 - r^2 [S1]$$



$$SID = \frac{\sqrt{2}}{m} \sum_{j=1}^m \frac{|x_j - y_j|}{x_j + y_j} \quad [S2]$$

Where  $m$  is the number of common species existing between the two compared profiles and,  $x$  and  $y$  are the relative mass of the species  $j$  in each factor profile. According to Pernigotti & Belis, 2018,  $PD < 0.4$  and  $SID < 1$  are considered as acceptable criteria for profile similarity.

This method was used to evaluate the similarity of the resolved factors in La Paz-El Alto with what was found in France by Borlaza et al., 2021 and Weber et al., 2019 (Figure S6). From the 11 resolved sources, only 8 were comparable with what was obtained from the French-sites source apportionment, out of which 4 resulted to be significantly similar to what was observed in France: primary biogenic aerosols, biomass burning, secondary sulfate and traffic 2. Although waste burning was not among the identified sources in France, this factor was compared to the industrial emissions observed in France. The disparities between the remaining factors (dust, secondary nitrate, MSA-rich and traffic 1) was largest in the PD parameter, which is highly sensitive to variation in the major mass fractions of the PM, and will be discussed below.

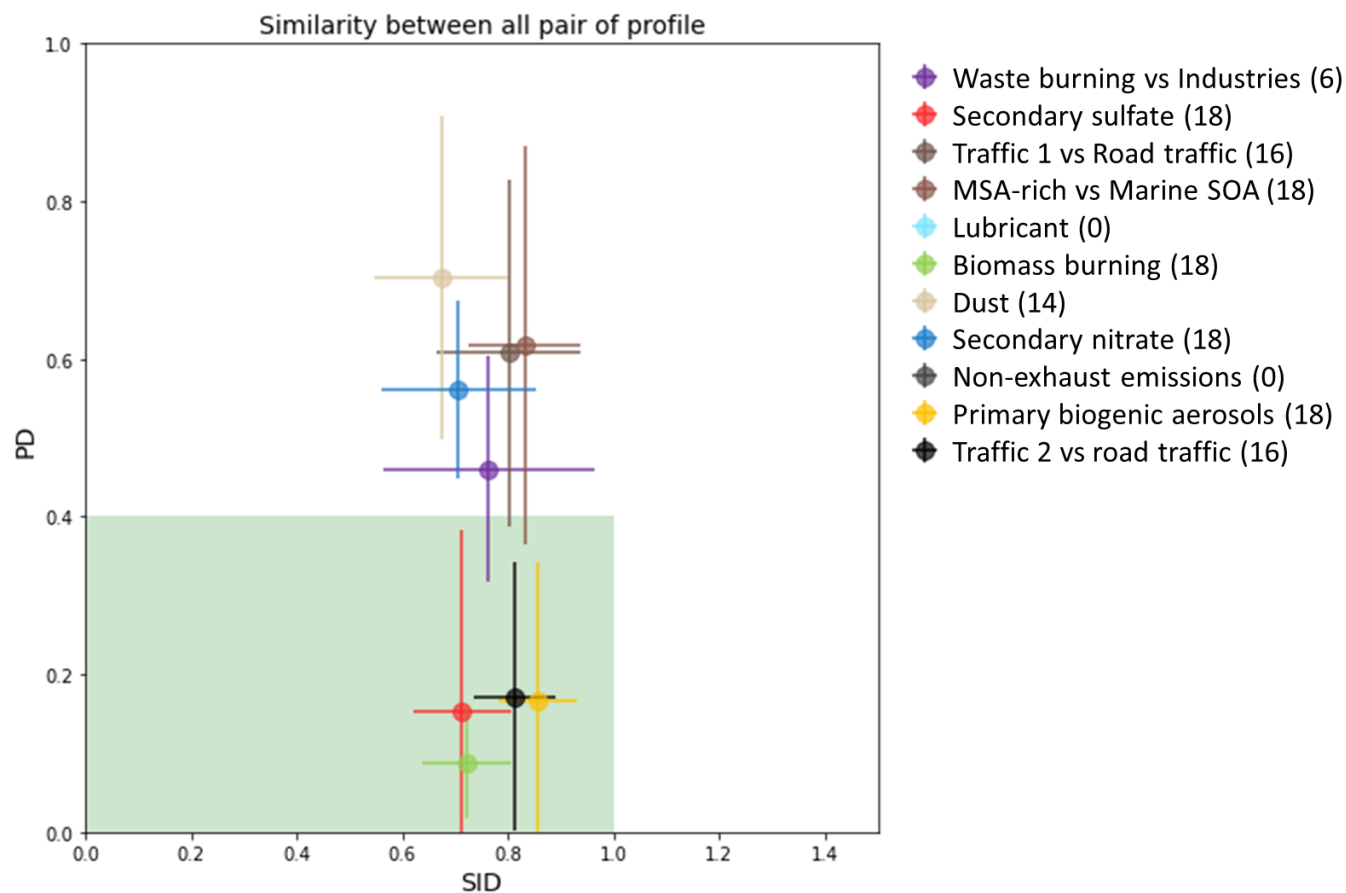

**Figure S6. Similarity plot of the sources of PM<sub>10</sub> in La Paz-El Alto and the sources identified by Borlaza et al. 2021 and Weber et al. 2019, by pairs, of profiles belonging to the same factor/source category. The mean  $\pm$  standard deviation (sd) for each source category are plotted (circles correspond to the mean and lines to the sd on both axis). The green box highlights the acceptable area for profile similarity according to Pernigotti & Belis, 2018.**

It was observed that the largest difference between the dust profiles, was the relative abundance of EC, OC, sulfate and nitrate assigned to the factors. The abundance of such species in the dust profiles in France was considerably higher compared to La Paz. In contrast, the relative concentrations of Al and Fe were generally higher for LP-EA. This shows that not only the composition of dust but the aging of the air masses carrying it are different. Similarly, for secondary nitrate, the OC and EC relative concentrations found in the secondary nitrate factor in LP-EA was generally higher than in France. This is likely because the main source of secondary-nitrate precursors in LP-EA are vehicular gaseous emissions and since the process through which secondary nitrate is formed is a relatively fast chemical process, the PMF was not able to fully separate both factors. On the other hand, nitrate relative concentrations were 2 to 4 times higher than what was observed in LP\_EA. The largest difference observed in the MSA-rich chemical profiles, that led to high PD values, were the relative abundances of OC, sulfate, Al and Fe. Specifically, OC and sulfate were repeatedly higher in France, which gives an idea of the aging processes that secondary marine organic aerosols undergo. In contrast, in LP-EA, Al and Fe relative masses were significantly higher than in France. This is likely due to the mixing that takes place during the transport of this secondary aerosols across the Altiplano until reaching the

metropolis. Traffic 1 had noticeably higher concentrations of Al and Fe in LP-EA but lower OC, sulfates and nitrates. In contrast, high OC relative concentrations in traffic 2, primary biogenic emissions, secondary sulfate and biomass burning, in both LP-EA and France pull the PD towards lower values.

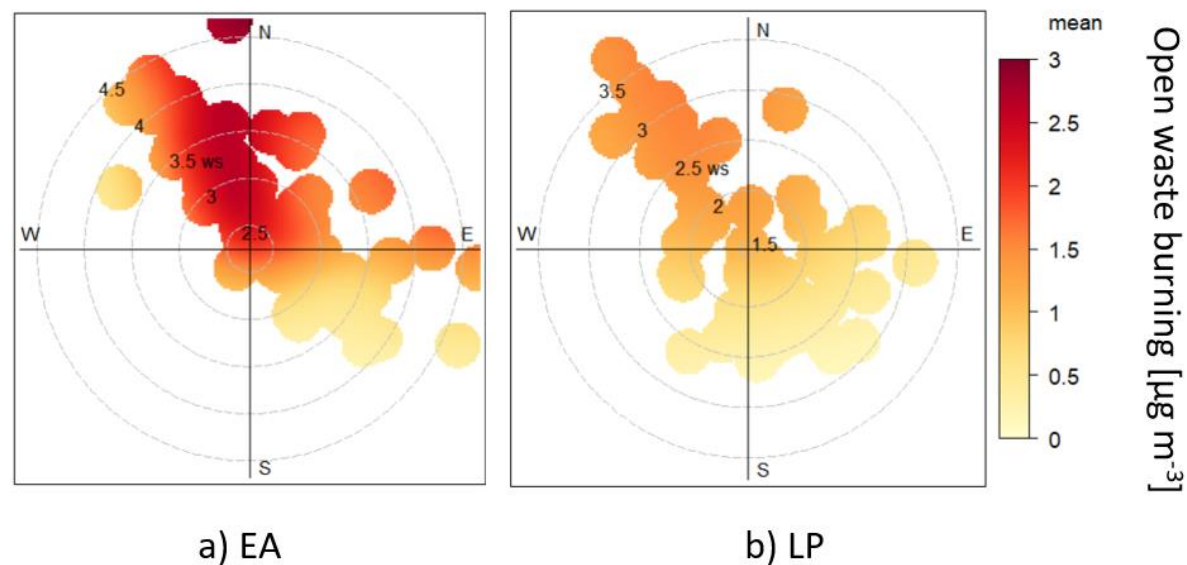

Figure S7. Polar plot showing the mean concentrations attributed to open waste burning and the associated wind speed ( $\text{m s}^{-1}$ ) and wind direction.

## References

- Belis, C. A., Pernigotti, D., Karagulian, F., Pirovano, G., Larsen, B. R., Gerboles, M., and Hopke, P. K.: A new methodology to assess the performance and uncertainty of source apportionment models in intercomparison exercises, *Atmos. Environ.*, 119, 35–44, <https://doi.org/10.1016/j.atmosenv.2015.08.002>, 2015.
- Besombes, J. L., Maître, A., Patissier, O., Marchand, N., Chevron, N., Stoklov, M., and Masclet, P.: Particulate PAHs observed in the surrounding of a municipal incinerator, *Atmos. Environ.*, 35, 6093–6104, [https://doi.org/10.1016/S1352-2310\(01\)00399-5](https://doi.org/10.1016/S1352-2310(01)00399-5), 2001.
- Borlaza, L. J. S., Weber, S., Uzu, G., Jacob, V., Cañete, T., Micallef, S., Trébuchon, C., Slama, R., Favez, O., and Jaffrezo, J. L.: Disparities in particulate matter ( $\text{PM}_{10}$ ) origins and oxidative potential at a city scale (Grenoble, France) - Part 1: Source apportionment at three neighbouring sites, *Atmos. Chem. Phys.*, 21, 5415–5437, <https://doi.org/10.5194/acp-21-5415-2021>, 2021.
- Cavalli, F., Viana, M., Yttri, K. E., Genberg, J., and Putaud, J. P.: Toward a standardized thermal-optical protocol for measuring atmospheric organic and elemental carbon:

The eusaar protocol, *Atmos. Meas. Tech.*, 3, 79–89, 2010.

Golly, B.: Etude des sources et de la dynamique atmosphérique de polluants organiques particulaires en vallées alpines : apport de nouveaux traceurs organiques aux modèles récepteurs, 292, 2014.

Jaffrezo, J. L., Aymoz, G., and Cozic, J.: Size distribution of EC and OC in the aerosol of Alpine valleys during summer and winter, *Atmos. Chem. Phys.*, 5, 2915–2925, <https://doi.org/10.5194/acp-5-2915-2005>, 2005.

Pernigotti, D. and Belis, C. A.: DeltaSA tool for source apportionment benchmarking, description and sensitivity analysis, *Atmos. Environ.*, 180, 138–148, <https://doi.org/10.1016/j.atmosenv.2018.02.046>, 2018.

Piot, C., Jaffrezo, J. L., Cozic, J., Pissot, N., El Haddad, I., Marchand, N., and Besombes, J. L.: Quantification of levoglucosan and its isomers by High Performance Liquid Chromatography-Electrospray Ionization tandem Mass Spectrometry and its applications to atmospheric and soil samples, *Atmos. Meas. Tech.*, 5, 141–148, <https://doi.org/10.5194/amt-5-141-2012>, 2012.

Querol, X., Alastuey, A., Rodriguez, S., Plana, F., Mantilla, E., and Ruiz, C. R.: Monitoring of PM10 and PM2.5 around primary particulate anthropogenic emission sources, *Atmos. Environ.*, 35, 845–858, [https://doi.org/10.1016/S1352-2310\(00\)00387-3](https://doi.org/10.1016/S1352-2310(00)00387-3), 2001.

Weber, S., Salameh, D., Albinet, A., Alleman, L. Y., Waked, A., Besombes, J. L., Jacob, V., Guillaud, G., Meshbah, B., Rocq, B., Hulin, A., Dominik-Sègue, M., Chrétien, E., Jaffrezo, J. L., and Favez, O.: Comparison of PM10 sources profiles at 15 french sites using a harmonized constrained positive matrix factorization approach, *Atmosphere (Basel)*, 10, 1–22, <https://doi.org/10.3390/atmos10060310>, 2019.
